# Supplementary material for: Imidazolium Salts for Candida spp. Antibiofilm High-Density Polyethylene-Based Biomaterials
Source: MDPI journal article supplement (doi:10.3390/polym15051259), 2023-03-01
Supplement: s1 [file s1]

## Supporting Information

# Imidazolium Salts for *Candida* spp. Antibiofilm High-Density Polyethylene-Based Biomaterials

Clarissa Martins Leal Schrekker<sup>1</sup>, Yuri Clemente Andrade Sokolovicz<sup>2</sup>, Maria Grazia Raucci<sup>3</sup>,  
Claudio Alberto Martins Leal,<sup>2</sup> Luigi Ambrosio<sup>3</sup>, Mário Lettieri Teixeira<sup>4</sup>, Alexandre  
Meneghello Fuentefria<sup>1,5,\*</sup>, Henri Stephan Schrekker<sup>2,\*</sup>

<sup>1</sup> Institute of Basic Health Sciences, Universidade Federal do Rio Grande do Sul (UFRGS), Rua Sarmiento Leite 500, Porto Alegre, RS, 90050-170, Brazil; cla.schrekker@gmail.com (C.M.L.S.)

<sup>2</sup> Laboratory of Technological Processes and Catalysis, Institute of Chemistry, Universidade Federal do Rio Grande do Sul (UFRGS), Avenida Bento Gonçalves 9500, Porto Alegre, RS, 91501-970, Brazil; yurisokolovicz@gmail.com (Y.C.A.S.); camleal45@gmail.com (C.A.M.L.)

<sup>3</sup> Institute of Polymers, Composites and Biomaterials, National Research Council of Italy (IPCB-CNR), Viale John Fitzgerald Kennedy 54, Mostra d'Oltremare Padiglione 20, 80125 Naples, Italy; mariagrazia.raucci@cnr.it (M.G.R.); luigi.ambrosio@cnr.it (L.A.)

<sup>4</sup> Laboratory of Biochemistry and Toxicology, Instituto Federal Catarinense (IFC), Rodovia SC 283 – km 17, Concórdia, SC, 89703-720, Brazil; mario.teixeira@ifc.edu.br

<sup>5</sup> Faculty of Pharmacy, Universidade Federal do Rio Grande do Sul (UFRGS), Avenida Ipiranga 2752, Porto Alegre, RS, 90610-000, Brazil

\*Correspondence: alexandre.fuentefria@ufrgs.br (A.M.F.); henri.schrekker@ufrgs.br (H.S.S.).

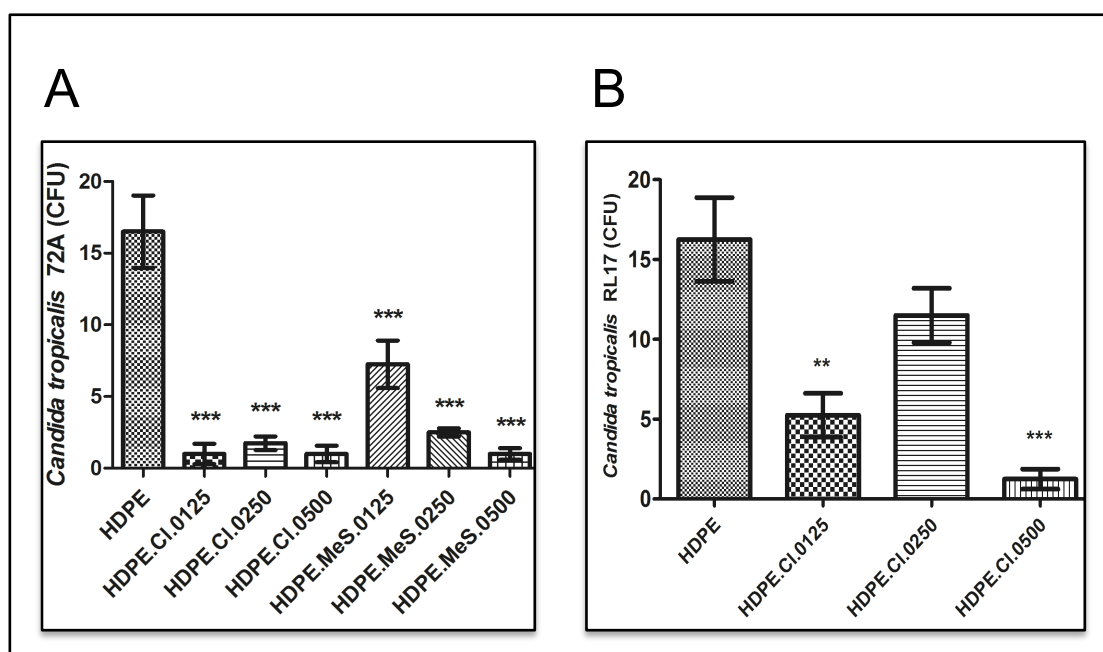

**Figure S1.** (A) Vertical bar graph of the biomaterial's antibiofilm activity, as determined by the antibiofilm assay ( $10^{-1}$  dilution) with HDPE, HDPE.Cl.0125, HDPE.Cl.0250, HDPE.Cl.0500, HDPE.MeS.0125, HDPE.MeS.0250 and HDPE.MeS.0500 against the *Candida tropicalis* 72A isolate. The data represent the mean  $\pm$  standard deviation of 4 HDPE and 24 HDPE.IS samples. The P value was  $<0.0001$ , considered very significant for all HDPE.IS biomaterials. HDPE vs. HDPE.Cl.0125 \*\*\*  $P<0.001$ , HDPE vs. HDPE.Cl.0250 \*\*\*  $P<0.001$ , HDPE vs. HDPE.Cl.0500 \*\*\*  $P<0.001$ , HDPE vs. HDPE.MeS.0125 \*\*\*  $P<0.001$ , HDPE vs. HDPE.MeS.0250 \*\*\*  $P<0.001$  and HDPE vs. HDPE.MeS.0500 \*\*\*  $P<0.001$ . (B) Vertical bar graph of the biomaterial's antibiofilm activity, as determined by the antibiofilm assay ( $10^{-1}$  dilution) with HDPE, HDPE.Cl.0125, HDPE.Cl.0250 and HDPE.Cl.0500, against the *C. tropicalis* RL17 isolate. The data represent the mean  $\pm$  standard deviation of 4 HDPE and 12 HDPE.IS samples. The P value was 0.0003, considered significant for all HDPE.IS biomaterials. HDPE vs. HDPE.Cl.0125 \*\*  $P<0.01$  and HDPE vs. HDPE.Cl.0500 \*\*\*  $P<0.001$ .

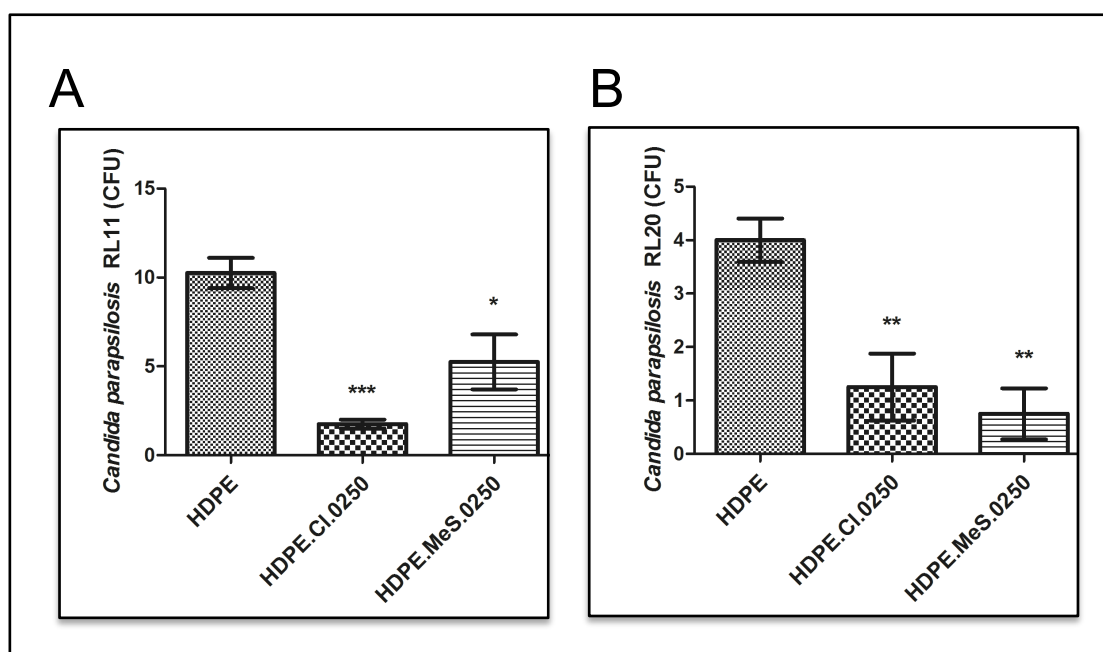

**Figure S2.** (A) Vertical bar graph of the biomaterial's antibiofilm activity, as determined by the antibiofilm assay ( $10^{-1}$  dilution) with HDPE, HDPE.Cl.0250 and HDPE.MeS.0250, against the *C. parapsilosis* RL11 isolate. The data represent the mean  $\pm$  standard deviation of 4 HDPE and 8 HDPE.IS samples. The P value was 0.0008, considered significant for the HDPE.IS biomaterials. HDPE vs. HDPE.Cl.0250 \*\*\*  $P < 0.001$  and HDPE vs. HDPE.MeS.0250 \*  $P < 0.05$ . (B) Vertical bar graph of the biomaterial's antibiofilm activity, as determined by the antibiofilm assay ( $10^{-1}$  dilution) with HDPE, HDPE.Cl.0250 and HDPE.MeS.0250, against the *C. parapsilosis* RL20 isolate. The data represent the mean  $\pm$  standard deviation of 4 HDPE and 8 HDPE.IS samples. The P value was 0.0032, considered very significant for all HDPE.IS biomaterials. HDPE vs. HDPE.Cl.0250 \*\*  $P < 0.01$  and HDPE vs. HDPE.MeS.0250 \*\*  $P < 0.01$ .

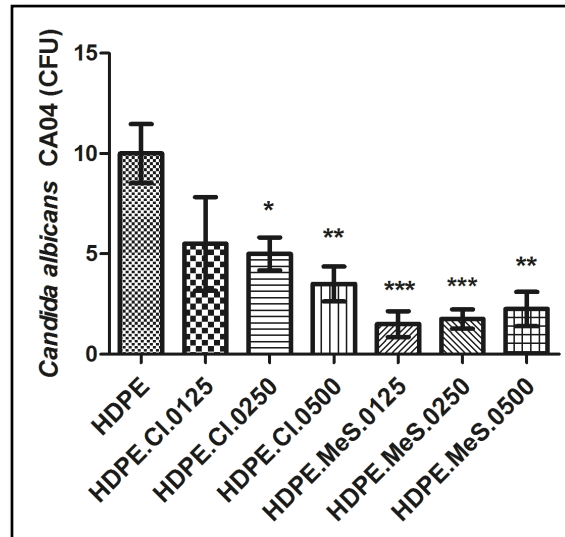

**Figure S3.** Vertical bar graph of the biomaterial's antibiofilm activity, as determined by the antibiofilm assay ( $10^{-1}$  dilution) with HDPE, HDPE.Cl.0125, HDPE.Cl.0250, HDPE.Cl.0500, HDPE.MeS.0125, HDPE.MeS.0250 and HDPE.MeS.0500, against the *C. albicans* CA04 isolate. The data represent the mean  $\pm$  standard deviation of 4 HDPE and 24 HDPE.IS samples. The P value was 0.0009, considered significant for the HDPE.IS biomaterials. HDPE vs. HDPE.Cl.0250 \*  $P < 0.05$ , HDPE vs. HDPE.Cl.0500 \*\*  $P < 0.01$ , HDPE vs. HDPE.MeS.0125 \*\*\*  $P < 0.001$ , HDPE vs. HDPE.MeS.0250 \*\*\*  $P < 0.001$  and HDPE vs. HDPE.MeS.0500 \*\*  $P < 0.01$ .

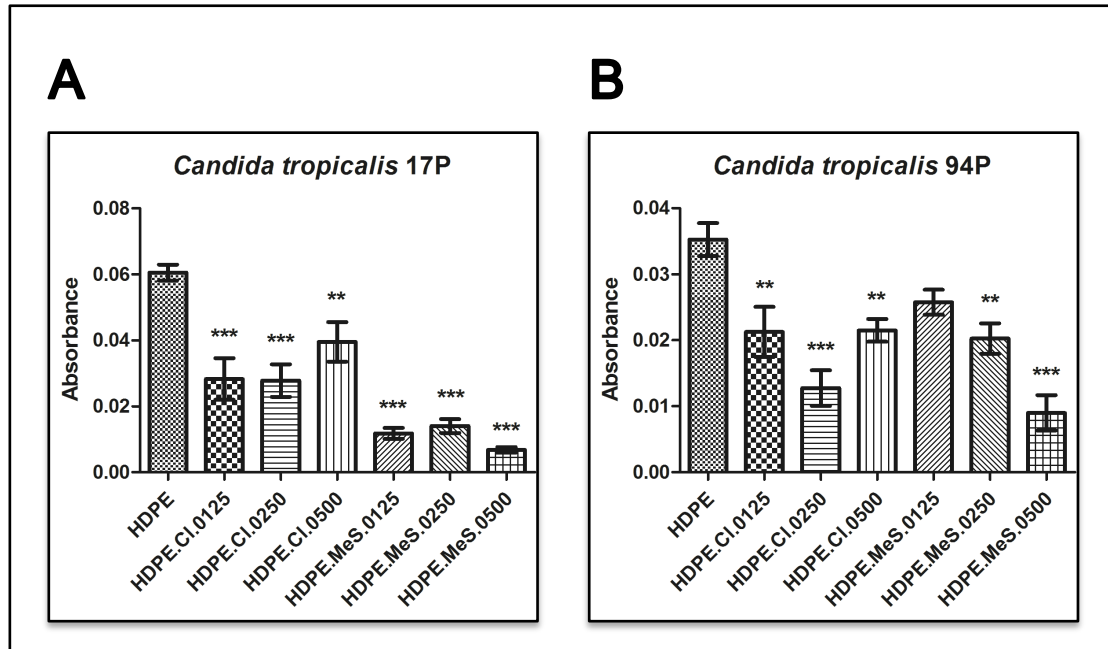

**Figure S4.** (A) Vertical bar graph of the biomaterial's biofilm impediment capacity, as determined by the absorbance value in the MAC assay with HDPE, HDPE.CI.0125, HDPE.CI.0250, HDPE.CI.0500, HDPE.MeS.0125, HDPE.MeS.0250 and HDPE.MeS.0500, against the *C. tropicalis* 17P isolate. The data represent the mean  $\pm$  standard deviation of 4 HDPE and 24 HDPE.IS samples. The P value was  $<0.0001$ , considered significant for the HDPE.IS biomaterials. HDPE vs. HDPE.CI.0125 \*\*\*  $P<0.001$ , HDPE vs. HDPE.CI.0250 \*\*\*  $P<0.001$ , HDPE vs. HDPE.CI.0500 \*\*  $P<0.01$ , HDPE vs. HDPE.MeS.0125 \*\*\*  $P<0.001$ , HDPE vs. HDPE.MeS.0250 \*\*\*  $P<0.001$  and HDPE vs. HDPE.MeS.0500 \*\*\*  $P<0.001$ . (B) Vertical bar graph of the biomaterial's biofilm impediment capacity, as determined by the absorbance value in the MAC assay with HDPE, HDPE.CI.0125, HDPE.CI.0250, HDPE.CI.0500, HDPE.MeS.0125, HDPE.MeS.0250 and HDPE.MeS.0500, against the *C. tropicalis* 94P isolate. The data represent the mean  $\pm$  standard deviation of 4 HDPE and 24 HDPE.IS samples. The P value was  $<0.0001$ , considered significant for the HDPE.IS biomaterials. HDPE vs. HDPE.CI.0125 \*\*  $P<0.01$ , HDPE vs. HDPE.CI.0250 \*\*\*  $P<0.001$ , HDPE vs. HDPE.CI.0500 \*\*  $P<0.01$ , HDPE vs. HDPE.MeS.0250 \*\*  $P<0.01$  and HDPE vs. HDPE.MeS.0500 \*\*\*  $P<0.001$ .

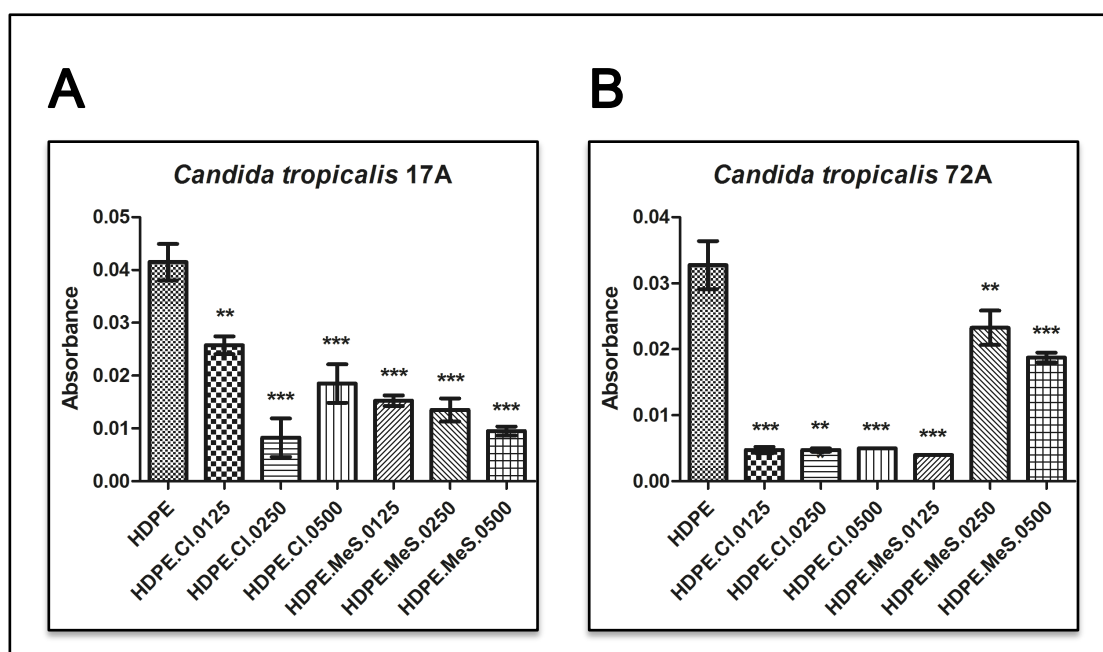

**Figure S5.** (A) Vertical bar graph of the biomaterial's biofilm impediment capacity, as determined by the absorbance value in the MAC assay with HDPE, HDPE.CI.0125, HDPE.CI.0250, HDPE.CI.0500, HDPE.MeS.0125, HDPE.MeS.0250 and HDPE.MeS.0500, against the *C. tropicalis* 17A isolate. The data represent the mean  $\pm$  standard deviation of 4 HDPE and 24 HDPE.IS samples. The P value was  $<0.0001$ , considered significant for the HDPE.IS biomaterials. HDPE vs. HDPE.CI.0125 \*\*  $P<0.01$ , HDPE vs. HDPE.CI.0250 \*\*\*  $P<0.001$ , HDPE vs. HDPE.CI.0500 \*\*\*  $P<0.001$ , HDPE vs. HDPE.MeS.0125 \*\*\*  $P<0.001$ , HDPE vs. HDPE.MeS.0250 \*\*\*  $P<0.001$  and HDPE vs. HDPE.MeS.0500 \*\*\*  $P<0.001$ . (B) Vertical bar graph of the biomaterial's biofilm impediment capacity, as determined by the absorbance value in the MAC assay with HDPE, HDPE.CI.0125, HDPE.CI.0250, HDPE.CI.0500, HDPE.MeS.0125, HDPE.MeS.0250 and HDPE.MeS.0500, against the *C. 72A* isolate. The data represent the mean  $\pm$  standard deviation of 4 HDPE and 28 HDPE.IS samples. The P value was  $<0.0001$ , considered significant for the HDPE.IS biomaterials. HDPE vs. HDPE.CI.0125 \*\*\*  $P<0.001$ , HDPE vs. HDPE.CI.0250 \*\*  $P<0.01$ , HDPE vs. HDPE.CI.0500 \*\*\*  $P<0.001$ , HDPE vs. HDPE.MeS.0125 \*\*\*  $P<0.001$ , HDPE vs. HDPE.MeS.0250 \*\*  $P<0.01$  and HDPE vs. HDPE.MeS.0500 \*\*\*  $P<0.001$ .

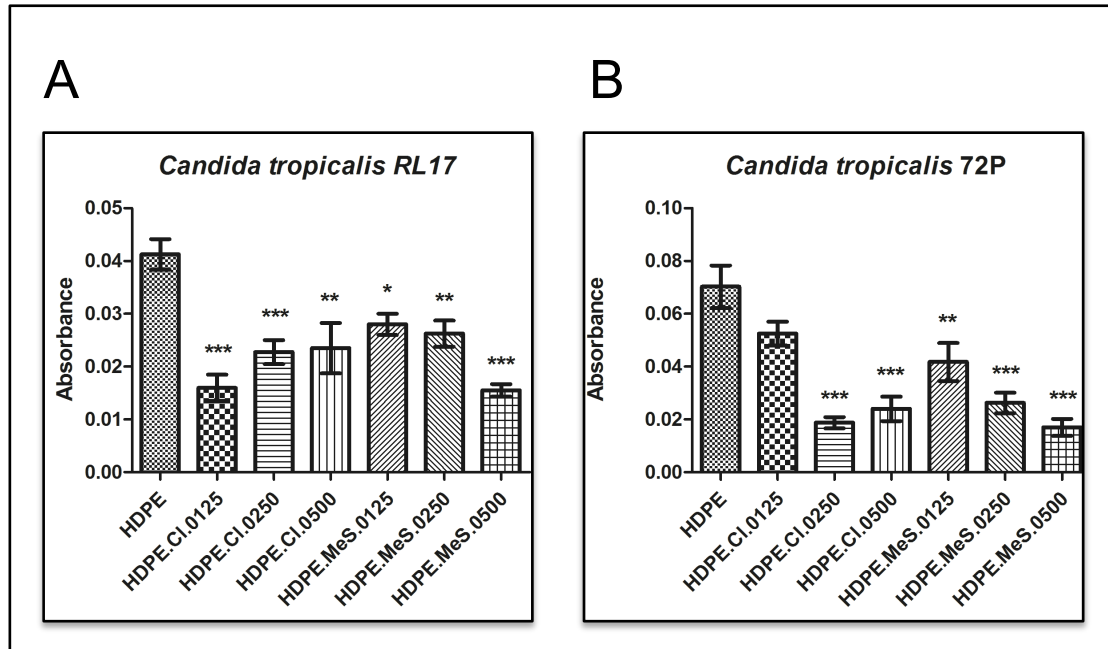

**Figure S6.** (A) Vertical bar graph of the biomaterial's biofilm impediment capacity, as determined by the absorbance value in the MAC assay with HDPE, HDPE.CI.0125, HDPE.CI.0250, HDPE.CI.0500, HDPE.MeS.0125, HDPE.MeS.0250 and HDPE.MeS.0500, against the *C. tropicalis* 17A isolate. The data represent the mean  $\pm$  standard deviation of 4 HDPE and 24 HDPE.IS samples. The P value was  $<0.0001$ , considered significant for the HDPE.IS biomaterials. HDPE vs. HDPE.CI.0125 \*\*  $P<0.01$ , HDPE vs. HDPE.CI.0250 \*\*\*  $P<0.001$ , HDPE vs. HDPE.CI.0500 \*\*\*  $P<0.001$ , HDPE vs. HDPE.MeS.0125 \*\*\*  $P<0.001$ , HDPE vs. HDPE.MeS.0250 \*\*\*  $P<0.001$  and HDPE vs. HDPE.MeS.0500 \*\*\*  $P<0.001$ . (B) Vertical bar graph of the biomaterial's biofilm impediment capacity, as determined by the absorbance value in the MAC assay with HDPE, HDPE.CI.0125, HDPE.CI.0250, HDPE.CI.0500, HDPE.MeS.0125, HDPE.MeS.0250 and HDPE.MeS.0500, against the *C. 72A* isolate. The data represent the mean  $\pm$  standard deviation of 4 HDPE and 28 HDPE.IS samples. The P value was  $<0.0001$ , considered significant for the HDPE.IS biomaterials. HDPE vs. HDPE.CI.0125 \*\*\*  $P<0.001$ , HDPE vs. HDPE.CI.0250 \*\*  $P<0.01$ , HDPE vs. HDPE.CI.0500 \*\*\*  $P<0.001$ , HDPE vs. HDPE.MeS.0125 \*\*\*  $P<0.001$ , HDPE vs. HDPE.MeS.0250 \*\*  $P<0.01$  and HDPE vs. HDPE.MeS.0500 \*\*\*  $P<0.001$ .

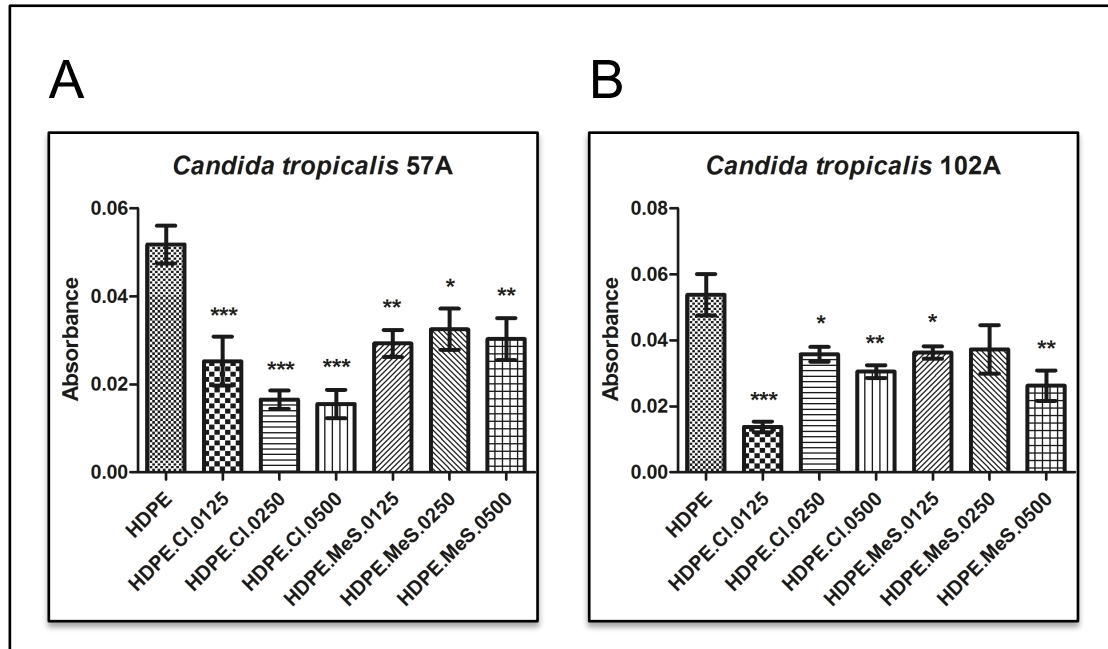

**Figure S7.** (A) Vertical bar graph of the biomaterial's biofilm impediment capacity, as determined by the absorbance value in the MAC assay with HDPE, HDPE.CI.0125, HDPE.CI.0250, HDPE.CI.0500, HDPE.MeS.0125, HDPE.MeS.0250 and HDPE.MeS.0500, against the *C. tropicalis* 57A isolate. The data represent the mean  $\pm$  standard deviation of 4 HDPE and 28 HDPE.IS samples. The P value was  $<0.0001$ , considered significant for the HDPE.IS biomaterials. HDPE vs. HDPE.CI.0125 \*\*\*  $P<0.001$ , HDPE vs. HDPE.CI.0250 \*\*\*  $P<0.001$ , HDPE vs. HDPE.CI.0500 \*\*\*  $P<0.001$ , HDPE vs. HDPE.MeS.0125 \*\*  $P<0.01$ , HDPE vs. HDPE.MeS.0250 \*  $P<0.05$  and HDPE vs. HDPE.MeS.0500 \*\*  $P<0.01$ . (B) Vertical bar graph of the biomaterial's biofilm impediment capacity, as determined by the absorbance value in the MAC assay with HDPE, HDPE.CI.0125, HDPE.CI.0250, HDPE.CI.0500, HDPE.MeS.0125, HDPE.MeS.0250 and HDPE.MeS.0500, against the *C. tropicalis* 102A isolate. The data represent the mean  $\pm$  standard deviation of 4 HDPE and 28 HDPE.IS samples. The P value was  $0.0001$ , considered significant for the HDPE.IS biomaterials. HDPE vs. HDPE.CI.0125 \*\*\*  $P<0.001$ , HDPE vs. HDPE.CI.0250 \*  $P<0.05$ , HDPE vs. HDPE.CI.0500 \*\*  $P<0.01$ , HDPE vs. HDPE.MeS.0125 \*  $P<0.05$  and HDPE vs. HDPE.MeS.0500 \*\*  $P<0.01$ .



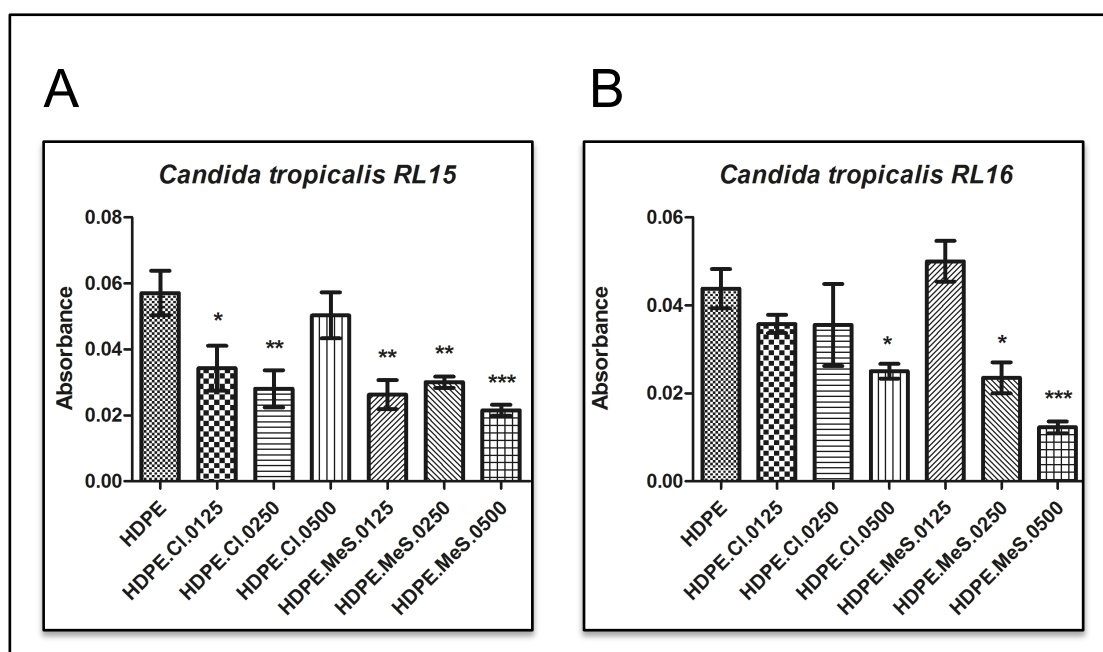

**Figure S8.** (A) Vertical bar graph of the biomaterial's biofilm impediment capacity, as determined by the absorbance value in the MAC assay with HDPE, HDPE.Cl.0125, HDPE.Cl.0250, HDPE.Cl.0500, HDPE.MeS.0125, HDPE.MeS.0250 and HDPE.MeS.0500, against the *C. tropicalis* RL15 isolate. The data represent the mean  $\pm$  standard deviation of 4 HDPE and 24 HDPE.IS samples. The P value was 0.0007, considered significant for the HDPE.IS biomaterials. HDPE vs. HDPE.Cl.0125 \*  $P < 0.05$ , HDPE vs. HDPE.Cl.0250 \*\*  $P < 0.01$ , HDPE vs. HDPE.MeS.0125 \*\*  $P < 0.01$ , HDPE vs. HDPE.MeS.0250 \*\*  $P < 0.01$  and HDPE vs. HDPE.MeS.0500 \*\*\*  $P < 0.001$ . (B) Vertical bar graph of the biomaterial's biofilm impediment capacity, as determined by the absorbance value in the MAC assay with HDPE, HDPE.Cl.0125, HDPE.Cl.0250, HDPE.Cl.0500, HDPE.MeS.0125, HDPE.MeS.0250 and HDPE.MeS.0500, against the *C. tropicalis* RL16 isolate. The data represent the mean  $\pm$  standard deviation of 4 HDPE and 24 HDPE.IS samples. The P value was 0.0002, considered significant for the HDPE.IS biomaterials. HDPE vs. HDPE.Cl.0500 \*  $P < 0.05$ , HDPE vs. HDPE.MeS.0250 \*  $P < 0.05$  and HDPE vs. HDPE.MeS.0500 \*\*\*  $P < 0.001$ .

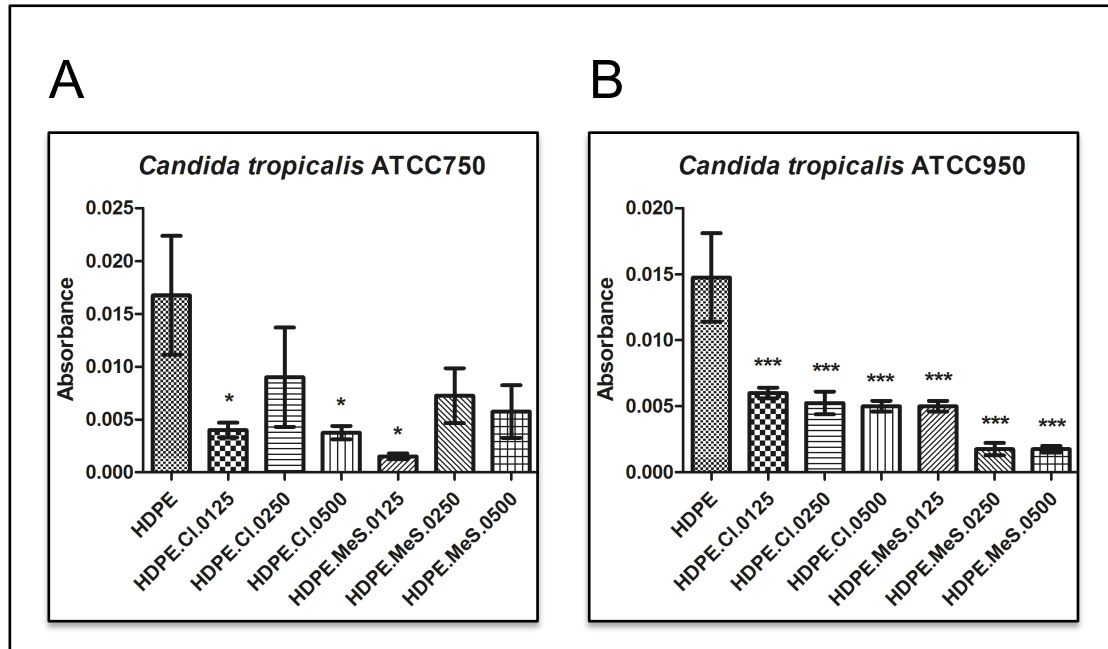

**Figure S9.** (A) Vertical bar graph of the biomaterial's biofilm impediment capacity, as determined by the absorbance value in the MAC assay with HDPE, HDPE.CI.0125, HDPE.CI.0250, HDPE.CI.0500, HDPE.MeS.0125, HDPE.MeS.0250 and HDPE.MeS.0500, against the *C. tropicalis* ATCC750 isolate. The data represent the mean  $\pm$  standard deviation of 4 HDPE and 24 HDPE.IS samples. The P value was 0.0491, considered significant for the HDPE.IS biomaterials. HDPE vs. HDPE.CI.0125 \*  $P < 0.05$ , HDPE vs. HDPE.CI.0500 \*  $P < 0.05$  and HDPE vs. HDPE.MeS.0125 \*  $P < 0.05$ . (B) Vertical bar graph of the biomaterial's biofilm impediment capacity, as determined by the absorbance value in the MAC assay with HDPE, HDPE.CI.0125, HDPE.CI.0250, HDPE.CI.0500, HDPE.MeS.0125, HDPE.MeS.0250 and HDPE.MeS.0500, against the *C. tropicalis* ATCC950 isolate. The data represent the mean  $\pm$  standard deviation of 4 HDPE and 24 HDPE.IS samples. The P value was  $< 0.0001$ , considered significant for the HDPE.IS biomaterials. HDPE vs. HDPE.CI.0125 \*\*\*  $P < 0.001$ , HDPE vs. HDPE.CI.0250 \*\*\*  $P < 0.001$ , HDPE vs. HDPE.CI.0500 \*\*\*  $P < 0.001$ , HDPE vs. HDPE.MeS.0125 \*\*\*  $P < 0.001$ , HDPE vs. HDPE.MeS.0250 \*\*\*  $P < 0.001$  and HDPE vs. HDPE.MeS.0500 \*\*\*  $P < 0.001$ .

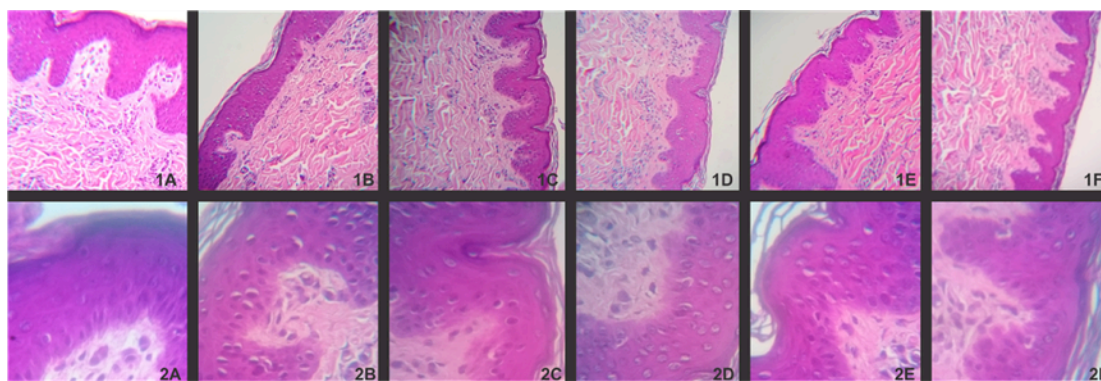

**Figure S10.** Histopathological evaluation of pig ear skin in contact with HDPE films that contain IS ( $C_{16}MImCl$  or  $C_{16}MImMeS$ ) and treated with PBS pH 7.0 buffer solution (negative control in increments of 100 and 400 times in magnitude): 100-Fold magnification of pig ear epithelial cells treated with (1A) PBS pH 7.0 buffer; (1B) HDPE; (1C) HDPE.Cl.0250; (1D) HDPE.Cl.0500; (1E) HDPE.MeS.0250; and (1F) HDPE.MeS.0500. 400-Fold magnification of pig ear epithelial cells treated with (2A) PBS pH 7.0 buffer; (2B) HDPE; (2C) HDPE.Cl.0250; (2D) HDPE.Cl.0500; (2E) HDPE.MeS.0250; and (2F) HDPE.MeS.0500.
